# Supplementary material
Source: PubMed Central journal article supplement (PMC3292293)
Supplement: cr2011205x1.pdf [file cr2011205x1.pdf]

Supplementary information, Figure S1

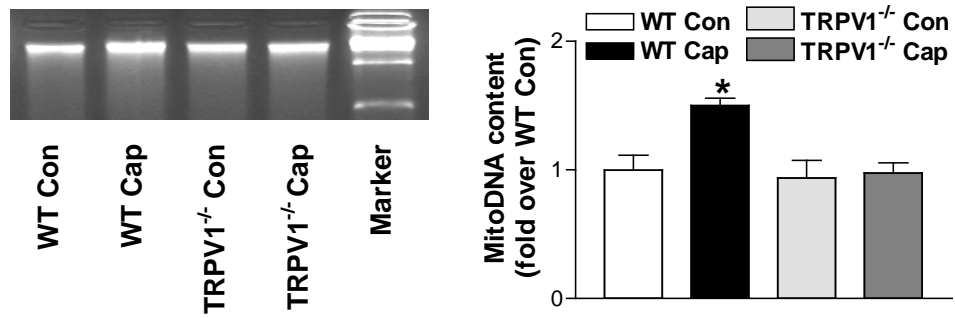

**Figure S1** Mitochondrial DNA (mitoDNA) content in skeletal muscles from WT and TRPV1<sup>-/-</sup> mice without (Con) or with (Cap) capsaicin administration. Summary data are means  $\pm$  S.E.M. for three to six mice. \* $P < 0.05$  vs WT Con.
