# Supplementary material
Source: PubMed Central journal article supplement (PMC3292293)
Supplement: cr2011205x2.pdf [file cr2011205x2.pdf]

Supplementary information, Figure S2

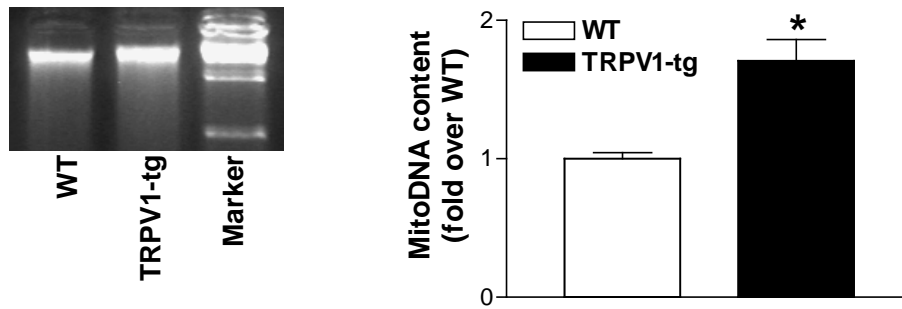

**Figure S2** Mitochondrial DNA (mitoDNA) content in skeletal muscles from TRPV1-transgenic (TRPV1-tg) mice and their wild-type littermates (WT). Summary data are means  $\pm$  S.E.M. for three mice. \* $P < 0.05$  vs WT.
