# Supplementary material
Source: PubMed Central journal article supplement (PMC3292293)
Supplement: cr2011205x3.pdf [file cr2011205x3.pdf]

Supplementary information, Figure S3

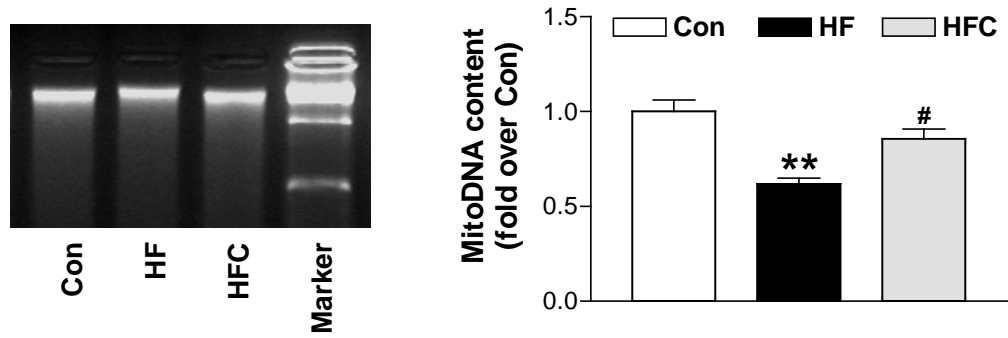

**Figure S3** Mitochondrial DNA (mitoDNA) content in skeletal muscles from WT mice fed with regular chow diet (Con), high-fat diet (HF) and HF plus capsaicin (HFC). Summary data are means  $\pm$  S.E.M. for three to six mice. \*\* $P < 0.01$  vs Con, # $P < 0.05$  vs HF.
