# Supplementary material
Source: PubMed Central journal article supplement (PMC3292293)
Supplement: cr2011205x4.pdf [file cr2011205x4.pdf]

## Supplementary information, Figure S4

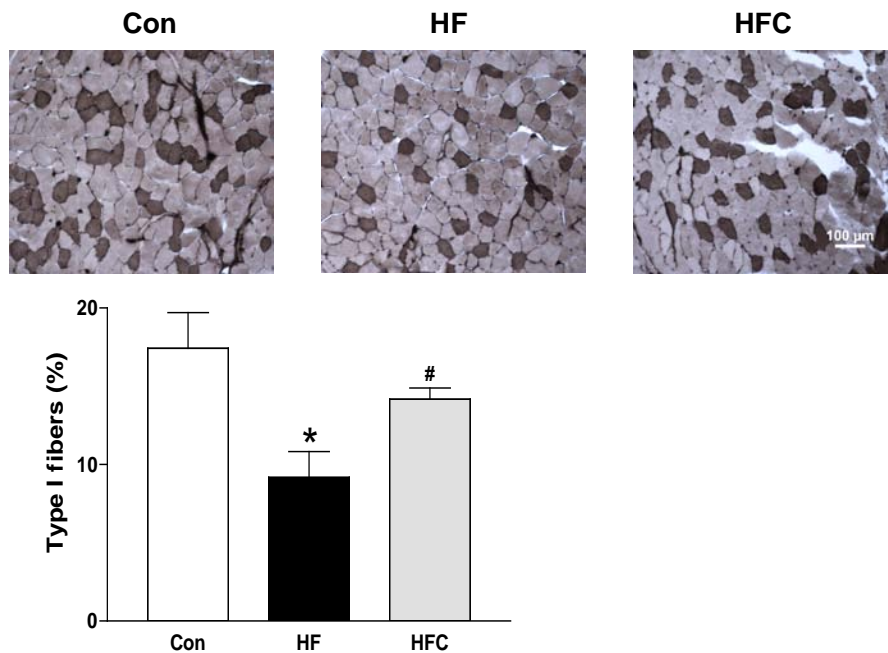

**Figure S4** The percentage of type I fibers in gastrocnemius muscles from WT mice fed with regular chow diet (Con), high-fat diet (HF) and HF plus capsaicin (HFC). Type I fibers are in dark brown. Summary data are means  $\pm$  S.E.M. for three to six mice. \* $P < 0.05$  vs Con, # $P < 0.05$  vs HF.
