# Supplementary material
Source: PubMed Central journal article supplement (PMC3292293)
Supplement: cr2011205x5.pdf [file cr2011205x5.pdf]

Supplementary information, Figure S5

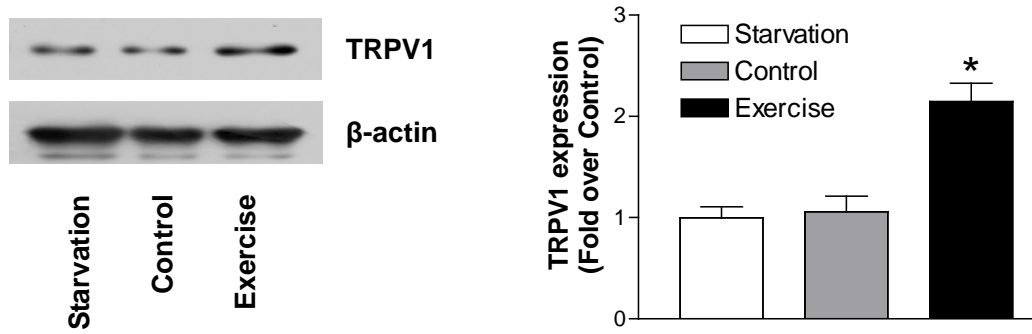

**Figure S5** TRPV1 protein expression in skeletal muscles of control mice (Control), mice deprived of food for 48 hours (Starvation) and mice subjected to treadmill running for continuous 5 days, 1 hour per day (Exercise). Summary data are means  $\pm$  S.E.M. for three mice. \* $P < 0.05$  vs Control.
