# Supplementary material
Source: PubMed Central journal article supplement (PMC3292293)
Supplement: cr2011205x6.pdf [file cr2011205x6.pdf]

Supplementary information, Figure S6

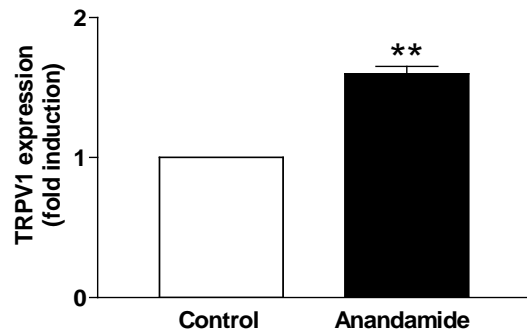

**Figure S6** TRPV1 protein expression in 3T3-L1 preadipocytes with or without 24-hours' anandamide (1  $\mu$ M) treatment. Data are means  $\pm$  S.E.M. for three independent experiments. \*\* $P$ <0.01 vs Control.
